# Supplementary material for: A novel microfluidic co-culture system for investigation of bacterial cancer targeting
Source: Royal Society of Chemistry journal article supplement (doi:10.1039/c3lc50163a), 2013-01-01
Supplement: c3lc50163a.pdf [file c3lc50163a.pdf]

Title: A novel microfluidic co-culture system for investigation of bacterial cancer targeting

Authors: Jung Woo Hong, Sukhyun Song and Jennifer H. Shin

[Supplementary Fig. S-1]

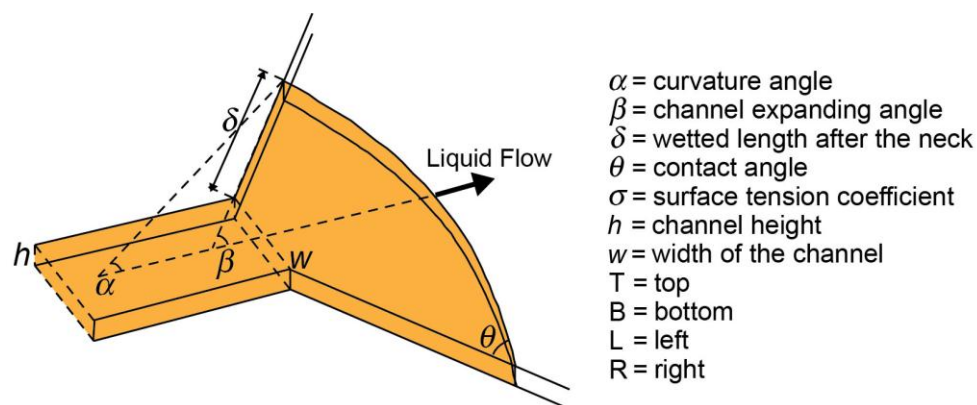

Capillary pressure at  $\delta$

$$P(\delta) = \sigma \left( \frac{\sin \alpha}{\alpha} \right) \left( \frac{\cos \theta_T + \cos \theta_B}{h} + \frac{\cos(\theta_L + \beta) + \cos(\theta_R + \beta)}{w + 2 \sin \beta \delta} \right)$$

Curvature angle

$$\alpha = \theta + \beta - \frac{\pi}{2}$$

At channel neck ( $\delta=0$ )

$$P_n = \lim_{\delta \rightarrow 0} P(\delta) = \sigma \left( \frac{\sin \alpha}{\alpha} \right) \left( \frac{\cos \theta_T + \cos \theta_B}{h} + \frac{\cos(\theta_L + \beta) + \cos(\theta_R + \beta)}{w} \right)$$

Capillary pressure at  $\delta$

$$P_n = \lim_{\delta \rightarrow 0} P(\delta) = \sigma \left( \frac{\sin \alpha}{\alpha} \right) \left( \frac{\cos \theta + \cos \theta_B}{h} + \frac{2 \cos(\theta + \beta)}{w} \right)$$

**Supplementary Fig. S-1** A schematic illustration of flow at an expanding channel. Passive stop valve was designed by theoretical equation (Chung et al. Analyst, 2007) for capillary pressure at an expanding channel. As shown above, the capillary pressure  $P_n$  is highly dependent on the expanding angle  $\beta$ . When  $P_n$  is negative flow stops and flow continues when  $P_n$  is positive. The expanding angle of the stop valve was designed to be  $110^\circ$  with the channel height of 100  $\mu\text{m}$  to achieve negative  $P_n$ .
