# Supplementary material for: A novel microfluidic co-culture system for investigation of bacterial cancer targeting
Source: Royal Society of Chemistry journal article supplement (doi:10.1039/c3lc50163a), 2013-01-01
Supplement: c3lc50163a_2.pdf [file c3lc50163a_2.pdf]

Title: A novel microfluidic co-culture system for investigation of bacterial cancer targeting

Authors: Jung Woo Hong, Sukhyun Song and Jennifer H. Shin

[Supplementary Fig. S-2]

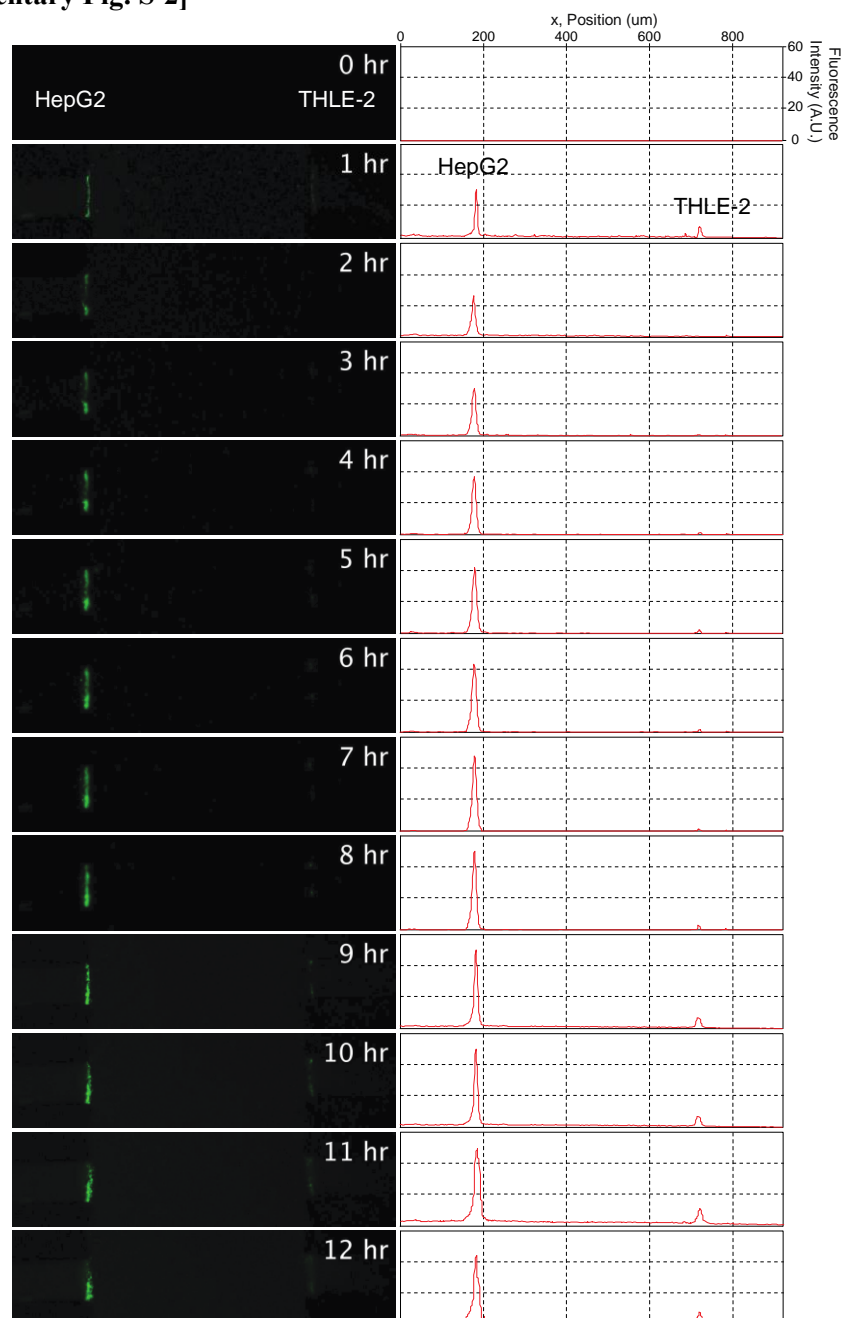

**Supplementary Fig. S-2** Time-lapse images of bacterial taxis behavior against normal and cancer hepatocytes. Chemotaxis behaviors of bacteria against HepG2 hepatocellular carcinoma cells (left) and THLE-2 normal hepatocytes (right) was observed for 12 hours. *S.typhimurium* have exhibited significant preference for the cancer cells.
